# Supplementary material
Source: PubMed Central journal article supplement (PMC6365167)
Supplement: NIHMS1510418-supplement-4.pdf [file NIHMS1510418-supplement-4.pdf]

## **SUPPLEMENTAL INFORMATION**

Supplemental Information includes nine figures and two movies, and can be found with this article online.

**Movie S1. Trajectory obtained from targeted molecular dynamics simulation for the stage I-II transition, Related to Figure 6.**

**Movie S2. Trajectory obtained from targeted molecular dynamics simulation for the stage III-VI transition, Related to Figure 7.**
